# Supplementary material
Source: Springer Nature journal article supplement (https://www.springermedizin.de/resource/supplementary/13023_2012_486_MOESM5_ESM.pdf/9642684)
Supplement: MOESM5 [file 9642684]

**Supplementary data file S-5: Mouse models of SLE as defined in the Mouse Genome Informatics Database**  
 (<http://www.informatics.jax.org/>) [1].

|                         |                                                                                                                                                                                              |                                                                                                                                                                                         |                                                                                                                                                                                                       |
|-------------------------|----------------------------------------------------------------------------------------------------------------------------------------------------------------------------------------------|-----------------------------------------------------------------------------------------------------------------------------------------------------------------------------------------|-------------------------------------------------------------------------------------------------------------------------------------------------------------------------------------------------------|
| <b>Human Disease</b>    | <b>Term: Systemic Lupus Erythematosus; SLE</b><br><b>OMIM ID: <a href="#">152700</a></b>                                                                                                     |                                                                                                                                                                                         |                                                                                                                                                                                                       |
| <b>Associated Genes</b> | Orthologous mouse and human markers where mutations in one or both species have been associated with phenotypes characteristic of this disease.                                              |                                                                                                                                                                                         |                                                                                                                                                                                                       |
|                         | <b>Mouse Gene</b>                                                                                                                                                                            | <b>Human Gene</b>                                                                                                                                                                       | <b>Characteristics of this human disease are associated with mutations in...</b>                                                                                                                      |
|                         | <a href="#">Dnase1</a><br><a href="#">Fcgr2b</a><br><a href="#">Ptpn22</a>                                                                                                                   | <a href="#">DNASE1</a><br><a href="#">FCGR2B</a><br><a href="#">PTPN22</a>                                                                                                              |  ...both mouse and human orthologous genes.                                                                        |
|                         | <a href="#">Lyz2</a><br><a href="#">C1qa</a><br><a href="#">C4b</a><br><a href="#">Ccr2</a><br><a href="#">Cd19</a><br><a href="#">Cd4</a><br><a href="#">Cdkn1a</a><br><a href="#">Csf2</a> | none identified<br><a href="#">C1QA</a><br><a href="#">C4B</a><br><a href="#">CCR2</a><br><a href="#">CD19</a><br><a href="#">CD4</a><br><a href="#">CDKN1A</a><br><a href="#">CSF2</a> |  ...the mouse gene.<br><i>OMIM data currently do not associate this disease with the orthologous human gene.</i> |

|                                  |                                  |
|----------------------------------|----------------------------------|
| <a href="#"><u>Def6</u></a>      | <a href="#"><u>DEF6</u></a>      |
| <a href="#"><u>Ep300</u></a>     | <a href="#"><u>EP300</u></a>     |
| <a href="#"><u>Fas</u></a>       | <a href="#"><u>FAS</u></a>       |
| <a href="#"><u>Gadd45a</u></a>   | <a href="#"><u>GADD45A</u></a>   |
| <a href="#"><u>Ikzf3</u></a>     | <a href="#"><u>IKZF3</u></a>     |
| <a href="#"><u>Il3</u></a>       | <a href="#"><u>IL3</u></a>       |
| <a href="#"><u>Junb</u></a>      | <a href="#"><u>JUNB</u></a>      |
| <a href="#"><u>Kit</u></a>       | <a href="#"><u>KIT</u></a>       |
| <a href="#"><u>Lyn</u></a>       | <a href="#"><u>LYN</u></a>       |
| <a href="#"><u>Man2a1</u></a>    | <a href="#"><u>MAN2A1</u></a>    |
| <a href="#"><u>Mta2</u></a>      | <a href="#"><u>MTA2</u></a>      |
| <a href="#"><u>Pparg</u></a>     | <a href="#"><u>PPARG</u></a>     |
| <a href="#"><u>Psen1</u></a>     | <a href="#"><u>PSEN1</u></a>     |
| <a href="#"><u>Psen2</u></a>     | <a href="#"><u>PSEN2</u></a>     |
| <a href="#"><u>Ptprc</u></a>     | <a href="#"><u>PTPRC</u></a>     |
| <a href="#"><u>Rasgrp1</u></a>   | <a href="#"><u>RASGRP1</u></a>   |
| <a href="#"><u>Rassf5</u></a>    | <a href="#"><u>RASSF5</u></a>    |
| <a href="#"><u>Rc3h1</u></a>     | <a href="#"><u>RC3H1</u></a>     |
| <a href="#"><u>Rxra</u></a>      | <a href="#"><u>RXRA</u></a>      |
| <a href="#"><u>Tnfrsf13b</u></a> | <a href="#"><u>TNFRSF13B</u></a> |
| <a href="#"><u>Tnfrsf9</u></a>   | <a href="#"><u>TNFRSF9</u></a>   |
| <a href="#"><u>Trove2</u></a>    | <a href="#"><u>TROVE2</u></a>    |

|                                                   |                                                                                                                                                                                                                                                                                                                                                                                                                                                                                                                                                                                                                                                                                                                                                                                                                                                                         |                                                                                                                                                                                                                                 |
|---------------------------------------------------|-------------------------------------------------------------------------------------------------------------------------------------------------------------------------------------------------------------------------------------------------------------------------------------------------------------------------------------------------------------------------------------------------------------------------------------------------------------------------------------------------------------------------------------------------------------------------------------------------------------------------------------------------------------------------------------------------------------------------------------------------------------------------------------------------------------------------------------------------------------------------|---------------------------------------------------------------------------------------------------------------------------------------------------------------------------------------------------------------------------------|
|                                                   | <p><a href="#">Bank1</a>                    <b><a href="#">BANK1</a></b><br/> <a href="#">C4a</a>                        <b><a href="#">C4A</a></b><br/> <a href="#">Fasl</a>                        <b><a href="#">FASLG</a></b><br/> <a href="#">Fcgr4</a>                      <b><a href="#">FCGR3A</a></b><br/> <a href="#">Itgax</a>                      <b><a href="#">ITGAX</a></b><br/> <a href="#">Pdccl1</a>                    <b><a href="#">PDCD1</a></b><br/> none identified            <b>SLEB1</b><br/> none identified            <b>SLEB3</b><br/> none identified            <b>SLEB4</b><br/> none identified            <b>SLEB5</b><br/> none identified            <b>SLEH1</b><br/> <a href="#">Stat4</a>                      <b><a href="#">STAT4</a></b><br/> <a href="#">Trex1</a>                      <b><a href="#">TREX1</a></b></p> | <p> <b>...the human gene.</b><br/> <i>MGI data currently do not associate this disease with mutations in the orthologous mouse gene.</i></p> |
| <p><b>Transgenes and other mutation types</b></p> | <p><a href="#">Igh</a> Characteristics of this human disease are associated with transgenes and other mutation types in mouse.</p>                                                                                                                                                                                                                                                                                                                                                                                                                                                                                                                                                                                                                                                                                                                                      |                                                                                                                                                                                                                                 |

| Allelic Composition                                                                                                                                                      |      | Genotype                                                                                                      | Ref(s)                                                                                                  |
|--------------------------------------------------------------------------------------------------------------------------------------------------------------------------|------|---------------------------------------------------------------------------------------------------------------|---------------------------------------------------------------------------------------------------------|
| Allelic Composition                                                                                                                                                      | Note | Genetic Background                                                                                            | Ref(s)                                                                                                  |
| <b>Models with phenotypic similarity to human disease where etiologies involve orthologs.<sup>1</sup></b>                                                                |      |                                                                                                               |                                                                                                         |
| <a href="#">Dnase1<sup>tm1Tmo</sup></a> / <a href="#">Dnase1<sup>tm1Tmo</sup></a>                                                                                        |      | involves: 129P2/OlaHsd * C57BL/6                                                                              | <a href="#">J:62549</a>                                                                                 |
| <a href="#">Fcgr2b<sup>tm1Ttk</sup></a> / <a href="#">Fcgr2b<sup>tm1Ttk</sup></a>                                                                                        |      | B6.129S4-Fcgr2b <sup>tm1Ttk</sup>                                                                             | <a href="#">J:64152</a>                                                                                 |
| <a href="#">Ptpn22<sup>tm2Achn</sup></a> / <a href="#">Ptpn22<sup>tm2Achn</sup></a><br><a href="#">Ptprc<sup>tm1Weis</sup></a> / <a href="#">Ptprc<sup>tm1Weis</sup></a> |      | B6.Cg-Ptprc <sup>tm1Weis</sup> Ptpn22 <sup>tm2Achn</sup>                                                      | <a href="#">J:147129</a>                                                                                |
| <b>Models with phenotypic similarity to human disease where etiologies are distinct.<sup>2</sup></b>                                                                     |      |                                                                                                               |                                                                                                         |
| <a href="#">C1qa<sup>tm1Mjw</sup></a> / <a href="#">C1qa<sup>tm1Mjw</sup></a>                                                                                            |      | involves: 129P2/Ola * 129S/SvEv * C57BL/6                                                                     | <a href="#">J:47315</a>                                                                                 |
| <a href="#">C4b<sup>tm1Crr</sup></a> / <a href="#">C4b<sup>tm1Crr</sup></a>                                                                                              |      | involves: 129S4/SvJae * C57BL/6J                                                                              | <a href="#">J:111811</a>                                                                                |
| <a href="#">Ccr2<sup>tm1Blck</sup></a> / <a href="#">Ccr2<sup>tm1Blck</sup></a><br><a href="#">Fas<sup>lpr</sup></a> / <a href="#">Fas<sup>lpr</sup></a>                 |      | MRL.Cg-Ccr2 <sup>tm1Blck</sup> Fas <sup>lpr</sup>                                                             | <a href="#">J:113343</a>                                                                                |
| <a href="#">Cd19<sup>tm1(cre)Cgn</sup></a> / <a href="#">Cd19<sup>+</sup></a><br><a href="#">Ep300<sup>tm2Reck</sup></a> / <a href="#">Ep300<sup>+</sup></a>             | 5    | involves: 129/Sv * 129P2/OlaHsd * C57BL/6                                                                     | <a href="#">J:147840</a>                                                                                |
| <a href="#">Cd4<sup>tm1Mak</sup></a> / <a href="#">Cd4<sup>tm1Mak</sup></a><br><a href="#">Igh-J<sup>tm2(3H9-VDJ*)Mwg</sup></a> / <a href="#">Igh-J<sup>+</sup></a>      |      | B6.Cg-Cd4 <sup>tm1Mak</sup> Igh-J <sup>tm2(3H9-VDJ*)Mwg</sup>                                                 | <a href="#">J:142389</a>                                                                                |
| <a href="#">Cdkn1a<sup>tm1Led</sup></a> / <a href="#">Cdkn1a<sup>tm1Led</sup></a><br><a href="#">Gadd45a<sup>tm1Ajf</sup></a> / <a href="#">Gadd45a<sup>tm1Ajf</sup></a> |      | either: (involves: 129P2/OlaHsd * 129S6/SvEvTac * C57BL/6) or (involves: 129S6/SvEvTac * 129X1/SvJ * C57BL/6) | <a href="#">J:76041</a>                                                                                 |
| <a href="#">Cdkn1a<sup>tm1Led</sup></a> / <a href="#">Cdkn1a<sup>tm1Led</sup></a>                                                                                        |      | involves: 129S6/SvEvTac                                                                                       | <a href="#">J:76041</a>                                                                                 |
| <a href="#">Csf2<sup>tm1Dran</sup></a> / <a href="#">Csf2<sup>tm1Dran</sup></a><br><a href="#">Il3<sup>tm1Glli</sup></a> / <a href="#">Il3<sup>tm1Glli</sup></a>         |      | B6.129S2-Csf2 <sup>tm1Dran</sup> Il3 <sup>tm1Glli</sup>                                                       | <a href="#">J:83086</a>                                                                                 |
| <a href="#">Def6<sup>Gt(OST307148)Lex</sup></a> / <a href="#">Def6<sup>Gt(OST307148)Lex</sup></a>                                                                        |      | involves: 129S5/SvEvBrd * C57BL/6                                                                             | <a href="#">J:106469</a>                                                                                |
| <a href="#">Fas<sup>lpr</sup></a> / <a href="#">Fas<sup>lpr</sup></a><br><a href="#">Tnfrsf9<sup>tm1Byk</sup></a> / <a href="#">Tnfrsf9<sup>tm1Byk</sup></a>             |      | MRL.Cg-Tnfrsf9 <sup>tm1Byk</sup> Fas <sup>lpr</sup>                                                           | <a href="#">J:120559</a>                                                                                |
| <a href="#">Fas<sup>lpr</sup></a> / <a href="#">Fas<sup>lpr</sup></a><br><a href="#">Igh-J<sup>tm2(3H9-VDJ*)Mwg</sup></a> / <a href="#">Igh-J<sup>+</sup></a>            |      | MRL.Cg-Fas <sup>lpr</sup> Igh-J <sup>tm2(3H9-VDJ*)Mwg</sup>                                                   | <a href="#">J:131138</a>                                                                                |
| <a href="#">Fas<sup>lpr</sup></a> / <a href="#">Fas<sup>lpr</sup></a>                                                                                                    |      | MRL/Mp-Fas <sup>lpr</sup>                                                                                     | <a href="#">J:27634</a> , <a href="#">J:28885</a> , <a href="#">J:108760</a> , <a href="#">J:131138</a> |
| <a href="#">Gadd45a<sup>tm1Ajf</sup></a> / <a href="#">Gadd45a<sup>tm1Ajf</sup></a>                                                                                      |      | either: (involves: 129P2/OlaHsd * C57BL/6) or (involves: 129X1/SvJ * C57BL/6)                                 | <a href="#">J:76041</a>                                                                                 |
| <a href="#">Ikzf3<sup>tm1Kge</sup></a> / <a href="#">Ikzf3<sup>tm1Kge</sup></a>                                                                                          |      | involves: 129S4/SvJae * C57BL/6                                                                               | <a href="#">J:50626</a> , <a href="#">J:81805</a>                                                       |

|                                                                                                                                                        |   |                                                                                          |                          |
|--------------------------------------------------------------------------------------------------------------------------------------------------------|---|------------------------------------------------------------------------------------------|--------------------------|
| <a href="#">Junb<sup>tm3Wag</sup>/Junb<sup>tm3Wag</sup></a><br><a href="#">Tg(KRT5-cre)1Tak/0</a>                                                      | 5 | involves: 129/Sv * 129P2/OlaHsd * C3H * C57BL/6                                          | <a href="#">J:155575</a> |
| <a href="#">Kit<sup>W-sh</sup>/Kit<sup>W-sh</sup></a><br><a href="#">Lyn<sup>tm1Ard</sup>/Lyn<sup>tm1Ard</sup></a>                                     |   | involves: 101 * 129P2/OlaHsd * C3H/HeH                                                   | <a href="#">J:161523</a> |
| <a href="#">Lyn<sup>tm1Ard</sup>/Lyn<sup>tm1Ard</sup></a>                                                                                              |   | involves: 129P2/OlaHsd                                                                   | <a href="#">J:161523</a> |
| <a href="#">Lyz2<sup>tm1(cre)Ifo</sup>/Lyz2<sup>+</sup></a><br><a href="#">Rxra<sup>tm1Krc</sup>/Rxra<sup>tm1Krc</sup></a>                             | 5 | involves: 129P2/OlaHsd * 129S4/SvJae * C57BL/6                                           | <a href="#">J:168799</a> |
| <a href="#">Lyz2<sup>tm1(cre)Ifo</sup>/Lyz2<sup>+</sup></a><br><a href="#">Pparg<sup>tm1.1Gonz</sup>/Pparg<sup>tm1.1Gonz</sup></a>                     | 5 | involves: 129P2/OlaHsd * 129X1/SvJ * C57BL/6                                             | <a href="#">J:168799</a> |
| <a href="#">Man2a1<sup>tm1Jxm</sup>/Man2a1<sup>tm1Jxm</sup></a>                                                                                        |   | involves: 129S1/Sv * 129X1/SvJ * C57BL/6                                                 | <a href="#">J:74579</a>  |
| <a href="#">Mta2<sup>tm1.1Yzha</sup>/Mta2<sup>tm1.1Yzha</sup></a>                                                                                      |   | involves: 129S4/SvJae * C57BL/6 * FVB/N                                                  | <a href="#">J:137101</a> |
| <a href="#">Psen1<sup>tm1Bdes</sup>/Psen1<sup>+</sup></a><br><a href="#">Psen2<sup>tm1Bdes</sup>/Psen2<sup>tm1Bdes</sup></a>                           |   | involves: 129P2/OlaHsd                                                                   | <a href="#">J:91235</a>  |
| <a href="#">Ptprc<sup>tm1Weis</sup>/Ptprc<sup>tm1Weis</sup></a>                                                                                        |   | involves: 129X1/SvJ * C57BL/6                                                            | <a href="#">J:66501</a>  |
| <a href="#">Ptprc<sup>tm1Weis</sup>/Ptprc<sup>+</sup></a>                                                                                              |   | involves: 129X1/SvJ * C57BL/6                                                            | <a href="#">J:66501</a>  |
| <a href="#">Rasgrp1<sup>lag</sup>/Rasgrp1<sup>lag</sup></a>                                                                                            |   | involves: 129 * C57BL/6                                                                  | <a href="#">J:85189</a>  |
| <a href="#">Rassf5<sup>tm1Kina</sup>/Rassf5<sup>tm1Kina</sup></a>                                                                                      |   | B6.Cg-Rassf5 <sup>tm1Kina</sup>                                                          | <a href="#">J:168749</a> |
| <a href="#">Rc3h1<sup>san</sup>/Rc3h1<sup>san</sup></a>                                                                                                |   | either: C57BL/6-Rc3h1 <sup>san</sup> or (involves: C57BL/6 * CBA/Ca)                     | <a href="#">J:98938</a>  |
| <a href="#">Tnfrsf13b<sup>tm1Vmd</sup>/Tnfrsf13b<sup>tm1Vmd</sup></a>                                                                                  |   | involves: C57BL/6                                                                        | <a href="#">J:82331</a>  |
| <a href="#">Trove2<sup>tm1Woln</sup>/Trove2<sup>tm1Woln</sup></a>                                                                                      |   | involves: 129S1/Sv * C57BL/6                                                             | <a href="#">J:84627</a>  |
| <a href="#">Trove2<sup>tm1Woln</sup>/Trove2<sup>tm1Woln</sup></a>                                                                                      |   | B6.129S1-Trove2 <sup>tm1Woln</sup>                                                       | <a href="#">J:84627</a>  |
| <a href="#">Trove2<sup>tm1Woln</sup>/Trove2<sup>+</sup></a>                                                                                            |   | involves: 129S1/Sv * C57BL/6                                                             | <a href="#">J:84627</a>  |
| <b>Models involving transgenes or other mutation types.<sup>3</sup></b>                                                                                |   |                                                                                          |                          |
| <a href="#">Cd4<sup>tm1Mak</sup>/Cd4<sup>tm1Mak</sup></a><br><a href="#">Igh-j<sup>tm2(3H9-VDJ*)Mwg</sup>/Igh-J<sup>+</sup></a>                        |   | B6.Cg-Cd4 <sup>tm1Mak</sup> Igh-J <sup>tm2(3H9-VDJ*)Mwg</sup>                            | <a href="#">J:142389</a> |
| <a href="#">Fas<sup>lpr</sup>/Fas<sup>lpr</sup></a><br><a href="#">Igh-j<sup>tm2(3H9-VDJ*)Mwg</sup>/Igh-J<sup>+</sup></a>                              |   | MRL.Cg-Fas <sup>lpr</sup> Igh-J <sup>tm2(3H9-VDJ*)Mwg</sup>                              | <a href="#">J:131138</a> |
| <a href="#">Igh-j<sup>tm2(3H9-VDJ*)Mwg</sup>/Igh-J<sup>+</sup></a>                                                                                     |   | B6.129P2-Igh-J <sup>tm2(3H9-VDJ*)Mwg</sup>                                               | <a href="#">J:142389</a> |
| <a href="#">Igh<sup>tm1(Igh564)Tik</sup>/Igh<sup>tm1(Igh564)Tik</sup></a><br><a href="#">Iqk<sup>tm1(Igk564)Tik</sup>/Iqk<sup>tm1(Igk564)Tik</sup></a> |   | B6.129S4-Igk <sup>tm1(Igk564)Tik</sup> Igh <sup>tm1(Igh564)Tik</sup>                     | <a href="#">J:113555</a> |
| <a href="#">Tcrb<sup>tm1Mom</sup>/Tcrb<sup>tm1Mom</sup></a><br><a href="#">Tcrd<sup>tm1Mom</sup>/Tcrd<sup>tm1Mom</sup></a>                             |   | B6.129P2-Tcrb <sup>tm1Mom</sup> Igh-J <sup>tm2(3H9-VDJ*)Mwg</sup> Tcrd <sup>tm1Mom</sup> | <a href="#">J:142389</a> |

|                                                                                     |                                                                                                                                                                                           |                                                 |                                                   |
|-------------------------------------------------------------------------------------|-------------------------------------------------------------------------------------------------------------------------------------------------------------------------------------------|-------------------------------------------------|---------------------------------------------------|
| <a href="#">Igh-j<sup>tm2(3H9-VDJ*)Mwg</sup>/Igh-J<sup>+</sup></a>                  |                                                                                                                                                                                           |                                                 |                                                   |
| <a href="#">Tg(ACTB-TNFRSF6B)754Jwu/?</a>                                           |                                                                                                                                                                                           | B6.Cg-Tg(Actb-TNFRSF6B)754Jwu                   | <a href="#">J:148162</a>                          |
| <a href="#">Tg(Igh-V-CD40lg)#Tsub/0</a>                                             |                                                                                                                                                                                           | C57BL/6-Tg(Igh-V-CD40lg)#Tsub                   | <a href="#">J:128824</a>                          |
| <a href="#">X/Yaa</a>                                                               |                                                                                                                                                                                           | BXSB                                            | <a href="#">J:7308</a> , <a href="#">J:108760</a> |
| <a href="#">X/Yaa</a>                                                               |                                                                                                                                                                                           | BXSB/Mp                                         | <a href="#">J:6235</a>                            |
| <a href="#">X/Yaa</a>                                                               |                                                                                                                                                                                           | (NZW x BXSB)F1                                  | <a href="#">J:7276</a>                            |
| <a href="#">X/Yaa</a>                                                               |                                                                                                                                                                                           | (NZW x SB)F1                                    | <a href="#">J:7276</a>                            |
| <a href="#">X/Yaa</a>                                                               |                                                                                                                                                                                           | (NZB x BXSB)F1                                  | <a href="#">J:6235</a>                            |
| <a href="#">X/Yaa</a>                                                               |                                                                                                                                                                                           | BXSB/MpJScr                                     | <a href="#">J:10973</a>                           |
| <b>No similarity to the expected human disease phenotype was found.<sup>4</sup></b> |                                                                                                                                                                                           |                                                 |                                                   |
| NOT                                                                                 | <a href="#">Csf2<sup>tm1Dran</sup>/Csf2<sup>tm1Dran</sup></a><br><a href="#">Ifng<sup>tm1Ts</sup>/Ifng<sup>tm1Ts</sup></a><br><a href="#">Il3<sup>tm1Glll</sup>/Il3<sup>tm1Glll</sup></a> | involves: 129S2/SvPas * 129S7/SvEvBrd * C57BL/6 | <a href="#">J:83086</a>                           |

<sup>1</sup>Human genes are associated with this disease. Mouse model genotypes include mutations in the orthologs of these human genes.

<sup>2</sup>Human genes are associated with this disease. Mouse model genotypes do not include mutations in the orthologs of these human genes.

<sup>3</sup>Models involving transgenes or other mutation types may also appear in other sections of the table.

<sup>4</sup>One or more human genes are associated with this human disease. The mouse genotype may involve mutations to orthologs of one or more of those genes, but the phenotype did not resemble the disease.

<sup>5</sup>Conditionally targeted allele(s)

## **References:**

1. Blake JA, Bult CJ, Kadin JA, Richardson JE, Eppig JT. The Mouse Genome Database (MGD): premier model organism resource for mammalian genomics and genetics. *Nucleic Acids Res* 2011;39(Database issue):D842-8.
